# Supplementary material for: Ligand control in thiol stabilized Au38 clusters
Source: Royal Society of Chemistry journal article supplement (doi:10.1039/c2ra00747a), 2012-01-01
Supplement: c2ra00747a.pdf [file c2ra00747a.pdf]

## **Supporting Information**

### **Ligand Control in Thiol Stabilized Au<sub>38</sub> Clusters**

*Daniel Stellwagen,<sup>1,2</sup> Andrew Weber,<sup>1</sup> Lisa Gudrun Bovenkamp,<sup>1</sup> Rongchao Jin,<sup>3</sup>  
Harry Bitter,<sup>2</sup> and Challa S.S.R. Kumar<sup>1\*</sup>*

<sup>1</sup> Center for advanced Microstructures and Devices, Louisiana State University, Baton Rouge, LA 70806, USA; <sup>2</sup> Utrecht University, 3508 TC Utrecht, The Netherlands; <sup>3</sup> Carnegie Mellon University; Department of Chemistry, Carnegie Mellon University, Pittsburgh, Pennsylvania, USA, 15213.

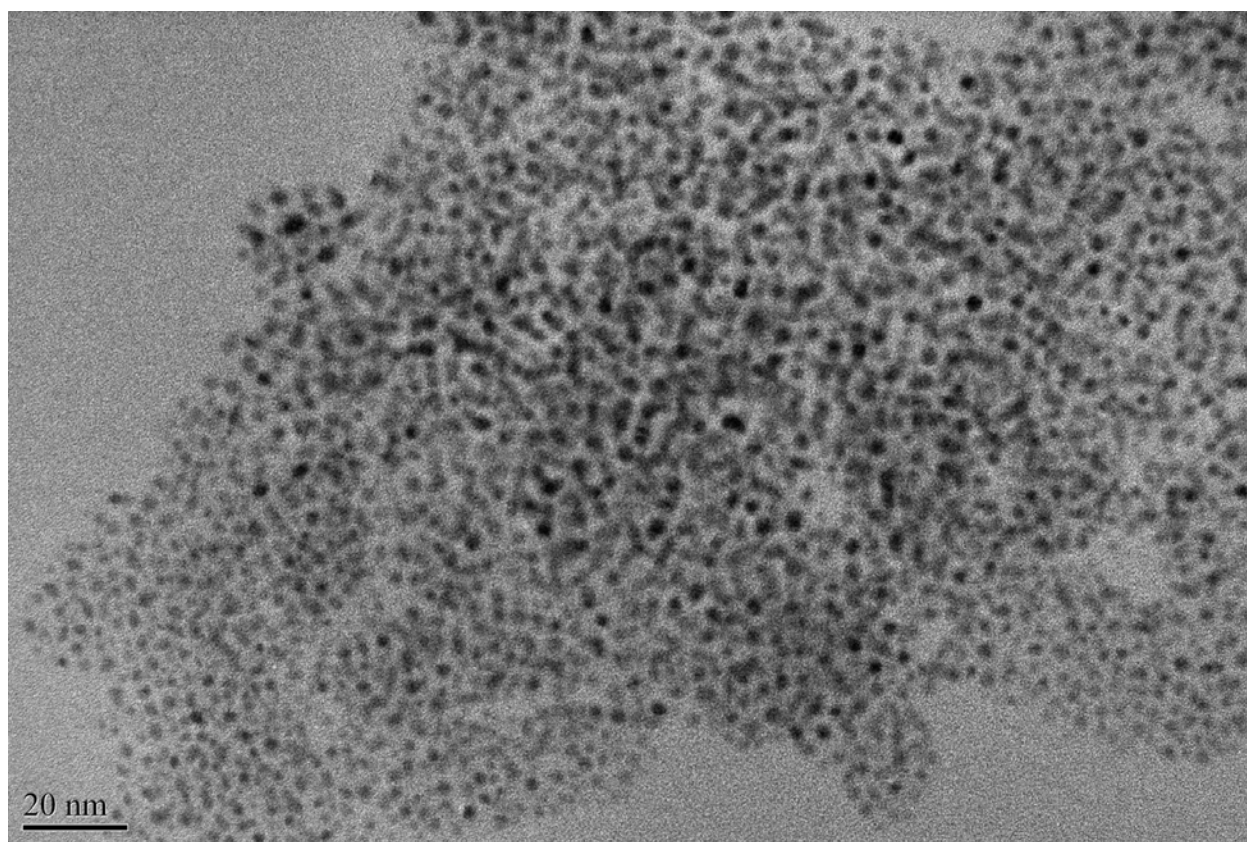

Figure-S1 : TEM image of the glutathione coated gold clusters prior to thiol etching.
